# Supplementary material
Source: PubMed Central journal article supplement (PMC8034392)
Supplement: NIHMS1679441-supplement-Tables.pdf [file NIHMS1679441-supplement-Tables.pdf]

**Cell, Volume 170**

## **Supplemental Information**

### **Oncolytic Virotherapy Promotes Intratumoral T Cell Infiltration and Improves Anti-PD-1 Immunotherapy**

**Antoni Ribas, Reinhard Dummer, Igor Puzanov, Ari VanderWalde, Robert H.I. Andtbacka, Olivier Michielin, Anthony J. Olszanski, Josep Malvehy, Jonathan Cebon, Eugenio Fernandez, John M. Kirkwood, Thomas F. Gajewski, Lisa Chen, Kevin S. Gorski, Abraham A. Anderson, Scott J. Diede, Michael E. Lassman, Jennifer Gansert, F. Stephen Hodi, and Georgina V. Long**

## SUPPLEMENTAL TABLES

**Supplemental Table 1 (Related to Figure 1). Patient Demographics and Baseline Clinical Characteristics**

|                                | <b>Talimogene Laherparepvec<br/>Plus Pembrolizumab<br/>(N=21)</b> |
|--------------------------------|-------------------------------------------------------------------|
| Sex, n (%)                     |                                                                   |
| Female                         | 13 (62)                                                           |
| Male                           | 8 (38)                                                            |
| Median (range) age, years      | 58 (37–89)                                                        |
| ECOG performance status, n (%) |                                                                   |
| 0                              | 19 (90)                                                           |
| 1                              | 2 (10)                                                            |
| Disease substage, n (%)        |                                                                   |
| IIIB                           | 1 (5)                                                             |
| IIIC                           | 6 (29)                                                            |
| IVM1a                          | 2 (10)                                                            |
| IVM1b                          | 4 (19)                                                            |
| IVM1c                          | 8 (38)                                                            |
| LDH, n (%)                     |                                                                   |
| ≤ULN                           | 16 (76)                                                           |
| >ULN to 2 × ULN                | 5 (24)                                                            |
| >2 × ULN                       | 0                                                                 |
| HSV serostatus, n (%)          |                                                                   |
| Positive                       | 16 (76)                                                           |
| Negative                       | 5 (24)                                                            |
| <i>BRAF</i> status, n (%)      |                                                                   |
| Mutant                         | 4 (19)                                                            |
| Wild-type                      | 17 (81)                                                           |

|                                  |          |
|----------------------------------|----------|
| PD-L1 status, <sup>a</sup> n (%) |          |
| Positive                         | 17 (81)  |
| Negative                         | 2 (10)   |
| Unknown                          | 2 (10)   |
| Prior anticancer therapy, n (%)  | 7 (33)   |
| Interferon                       | 4 (19.0) |
| Isolated limb perfusion          | 1 (4.8)  |
| Chemoembolization                | 0 (0.0)  |
| Eyedrops                         | 1 (4.8)  |
| Topical immunotherapy            | 1 (4.8)  |

---

ECOG=Eastern Cooperative Oncology Group; HSV=herpes simplex virus; LDH=lactate dehydrogenase; PD-L1=programmed death ligand 1; ULN=upper limit of normal.

<sup>a</sup>Cutoff for positivity was  $\geq 1\%$  PD-L1 by immunohistochemistry.

**Supplemental Table 2 (Related to Figure 1). Patient Incidence of Adverse Events**

|                                                                                          | Total              |                                 | Attributed to Talimogene Laherparepvec |                                 | Attributed to Pembrolizumab |                                 | Attributed to Talimogene Laherparepvec and/or Pembrolizumab |                                 |
|------------------------------------------------------------------------------------------|--------------------|---------------------------------|----------------------------------------|---------------------------------|-----------------------------|---------------------------------|-------------------------------------------------------------|---------------------------------|
|                                                                                          | Any Grade<br>n (%) | Grade 3/4<br>n (%) <sup>a</sup> | Any Grade<br>n (%)                     | Grade 3/4<br>n (%) <sup>a</sup> | Any Grade<br>n (%)          | Grade 3/4<br>n (%) <sup>a</sup> | Any Grade<br>n (%)                                          | Grade 3/4<br>n (%) <sup>a</sup> |
| Patient incidence of AEs irrespective of relationship to treatment                       | 21 (100)           | 11 (52)                         | -                                      | -                               | -                           | -                               | -                                                           | -                               |
| Patient incidence of treatment-related AEs                                               | 21 (100)           | 8 (38)                          | 20 (95)                                | 4 (19)                          | 20 (95)                     | 7 (33)                          | 21 (100)                                                    | 8 (38)                          |
| AEs occurring in ≥10% of patients irrespective of relationship to treatment <sup>b</sup> |                    |                                 |                                        |                                 |                             |                                 |                                                             |                                 |
| Fatigue                                                                                  | 14 (67)            | 0                               | 9 (43)                                 | 0                               | 13 (62)                     | 0                               | 13 (62)                                                     | 0                               |
| Fever                                                                                    | 11 (52)            | 0                               | 8 (38)                                 | 0                               | 6 (29)                      | 0                               | 9 (43)                                                      | 0                               |
| Chills                                                                                   | 10 (48)            | 0                               | 8 (38)                                 | 0                               | 6 (29)                      | 0                               | 10 (48)                                                     | 0                               |
| Diarrhea                                                                                 | 10 (48)            | 1 (5)                           | 4 (19)                                 | 0                               | 5 (24)                      | 0                               | 6 (29)                                                      | 0                               |
| Rash                                                                                     | 9 (43)             | 2 (10)                          | 6 (29)                                 | 0                               | 7 (33)                      | 2 (10)                          | 8 (38)                                                      | 2 (10)                          |
| Nausea                                                                                   | 8 (38)             | 0                               | 5 (24)                                 | 0                               | 3 (14)                      | 0                               | 6 (29)                                                      | 0                               |
| Headache                                                                                 | 8 (38)             | 1 (5)                           | 3 (14)                                 | 1 (5)                           | 1 (5)                       | 0                               | 3 (14)                                                      | 1 (5)                           |
| Cough                                                                                    | 8 (38)             | 0                               | 0                                      | 0                               | 1 (5)                       | 0                               | 1 (5)                                                       | 0                               |
| Arthralgia                                                                               | 7 (33)             | 0                               | 3 (14)                                 | 0                               | 7 (33)                      | 0                               | 7 (33)                                                      | 0                               |
| Vomiting                                                                                 | 7 (33)             | 0                               | 4 (19)                                 | 0                               | 3 (14)                      | 0                               | 5 (24)                                                      | 0                               |

|                                      |        |        |        |   |        |        |        |        |
|--------------------------------------|--------|--------|--------|---|--------|--------|--------|--------|
| Pruritus                             | 6 (29) | 0      | 4 (19) | 0 | 6 (29) | 0      | 6 (29) | 0      |
| Peripheral edema                     | 5 (24) | 0      | 0      | 0 | 1 (5)  | 0      | 1 (5)  | 0      |
| Hypothyroidism                       | 5 (24) | 0      | 1 (5)  | 0 | 5 (24) | 0      | 5 (24) | 0      |
| Influenza-like illness               | 5 (24) | 0      | 4 (19) | 0 | 2 (10) | 0      | 4 (19) | 0      |
| Vitiligo                             | 5 (24) | 0      | 2 (10) | 0 | 5 (24) | 0      | 5 (24) | 0      |
| Constipation                         | 4 (19) | 0      | 0      | 0 | 0      | 0      | 0      | 0      |
| Dyspnea                              | 4 (19) | 0      | 1 (5)  | 0 | 2 (10) | 0      | 2 (10) | 0      |
| Alanine aminotransferase increased   | 3 (14) | 2 (10) | 1 (5)  | 0 | 3 (14) | 1 (5)  | 3 (14) | 1 (5)  |
| Aspartate aminotransferase increased | 3 (14) | 1 (5)  | 1 (5)  | 0 | 2 (10) | 1 (5)  | 2 (10) | 1 (5)  |
| Hyperglycemia                        | 3 (14) | 2 (10) | 0      | 0 | 2 (10) | 2 (10) | 2 (10) | 2 (10) |
| Hyperthyroidism                      | 3 (14) | 0      | 0      | 0 | 3 (14) | 0      | 3 (14) | 0      |
| Myalgia                              | 3 (14) | 0      | 2 (10) | 0 | 2 (10) | 0      | 3 (14) | 0      |
| Back pain                            | 3 (14) | 0      | 0      | 0 | 0      | 0      | 0      | 0      |
| Pain in extremity                    | 3 (14) | 0      | 0      | 0 | 0      | 0      | 0      | 0      |
| Rash (maculopapular)                 | 3 (14) | 0      | 1 (5)  | 0 | 3 (15) | 0      | 3 (14) | 0      |
| Squamous cell carcinoma              | 3 (14) | 2 (10) | 0      | 0 | 0      | 0      | 0      | 0      |
| Alopecia                             | 3 (14) | 0      | 0      | 0 | 1 (5)  | 0      | 1 (5)  | 0      |

AE=adverse event.

<sup>a</sup>One grade 5 AE occurring during the study was attributed to disease progression. No grade 4 talimogene laherparepvec-related AEs occurred. One patient had grade 4 pembrolizumab-related pneumonitis; no other grade 4 pembrolizumab-related AEs occurred;

<sup>b</sup>no grade 4 events occurred in  $\geq 10\%$  of patients.

**Supplemental Table 3 (Related to Figure 1). Summary of Best Change in Injected and Noninjected Nonvisceral Lesions**

|                        | Injected Lesions<br>(n=16)<br>n (%) | Noninjected Nonvisceral<br>Lesions (n=10)<br>n (%) |
|------------------------|-------------------------------------|----------------------------------------------------|
| Any reduction          | 15 (93.7)                           | 6 (60)                                             |
| 50% to <100% reduction | 1 (6.3)                             | 0                                                  |
| 100% reduction         | 13 (81.3)                           | 6 (60)                                             |
| Never decrease         | 1 (6.3)                             | 4 (40)                                             |

**Supplemental Table 4 (Related to Figure 4). Cell Subset Changes Within the Tumor Between Injected Lesions at Week 6 and Baseline Lesions (Week 1)**

| <b>Cell subset</b> | <b>Baseline Density Mean<br/>(cells/mm<sup>2</sup>)</b> | <b>Week 6 Density Ratio to<br/>Baseline</b> | <b>P Value<sup>b</sup></b> |
|--------------------|---------------------------------------------------------|---------------------------------------------|----------------------------|
| CD3+               | 204.21                                                  | 2.57                                        | $2.28 \times 10^{-23}$     |
| CD4+               | 68.96                                                   | 2.73                                        | $7.56 \times 10^{-21}$     |
| CD8+               | 126.15                                                  | 2.47                                        | $3.70 \times 10^{-20}$     |
| FOXP3              | 32.53                                                   | 1.70                                        | $1.38 \times 10^{-8}$      |
| PD-1               | 202.24                                                  | 2.27                                        | $1.57 \times 10^{-17}$     |
| PD-L1              | 172.28                                                  | 2.73                                        | $1.99 \times 10^{-16}$     |
| CD68+              | 71.01                                                   | 1.09                                        | 0.41                       |
| CD45RO             | 204.57                                                  | 1.56                                        | $6.86 \times 10^{-6}$      |
| CD56+              | 339.99                                                  | 1.31                                        | $1.30 \times 10^{-3}$      |
| CD20+              | 1.58                                                    | 5.33                                        | $2.03 \times 10^{-9}$      |
| CTLA               | 22.49                                                   | 0.77                                        | 0.09                       |
| CD3+CD8+           | 89.82                                                   | 2.64                                        | $3.85 \times 10^{-20}$     |
| CD3+CD8+PD-1       | 61.69                                                   | 2.40                                        | $1.97 \times 10^{-15}$     |
| CD3+CD4+           | 68.96                                                   | 2.73                                        | $7.56 \times 10^{-21}$     |
| CD3+CD4+PD-1       | 32.57                                                   | 2.76                                        | $9.26 \times 10^{-20}$     |
| CD3+CD4+FOXP3      | 13.00                                                   | 1.90                                        | $1.46 \times 10^{-7}$      |

|                    |       |      |                        |
|--------------------|-------|------|------------------------|
| CD68+PD-L1         | 10.61 | 2.35 | $4.97 \times 10^{-9}$  |
| CD3+CD4+PD-L1      | 8.43  | 4.74 | $1.70 \times 10^{-20}$ |
| CD3+CD4+CD45RO     | 29.72 | 2.02 | $4.53 \times 10^{-8}$  |
| CD3+CD8+CD45RO     | 40.52 | 1.94 | $1.49 \times 10^{-7}$  |
| CD3+CD8+PD-L1      | 9.43  | 4.19 | $1.37 \times 10^{-16}$ |
| CD3+CD8+CD56       | 1.01  | 3.34 | $2.53 \times 10^{-6}$  |
| CD3+CD8+CD56+PD-L1 | 0.06  | 5.31 | $5.19 \times 10^{-5}$  |
| CD3+CD4+PD1        | 32.57 | 2.76 | $9.26 \times 10^{-20}$ |
| CD3+CD8+PD1        | 61.69 | 2.40 | $1.97 \times 10^{-15}$ |
| CD3+CD20+          | 1.58  | 5.33 | $2.03 \times 10^{-9}$  |
| CD3+CD20+PD-L1     | 0.16  | 6.35 | $1.15 \times 10^{-7}$  |

---
